# Supplementary material
Source: PubMed Central journal article supplement (PMC4605358)
Supplement: Supp_Fig1.pdf [file Supp_Fig1.pdf]

## Supplementary Data

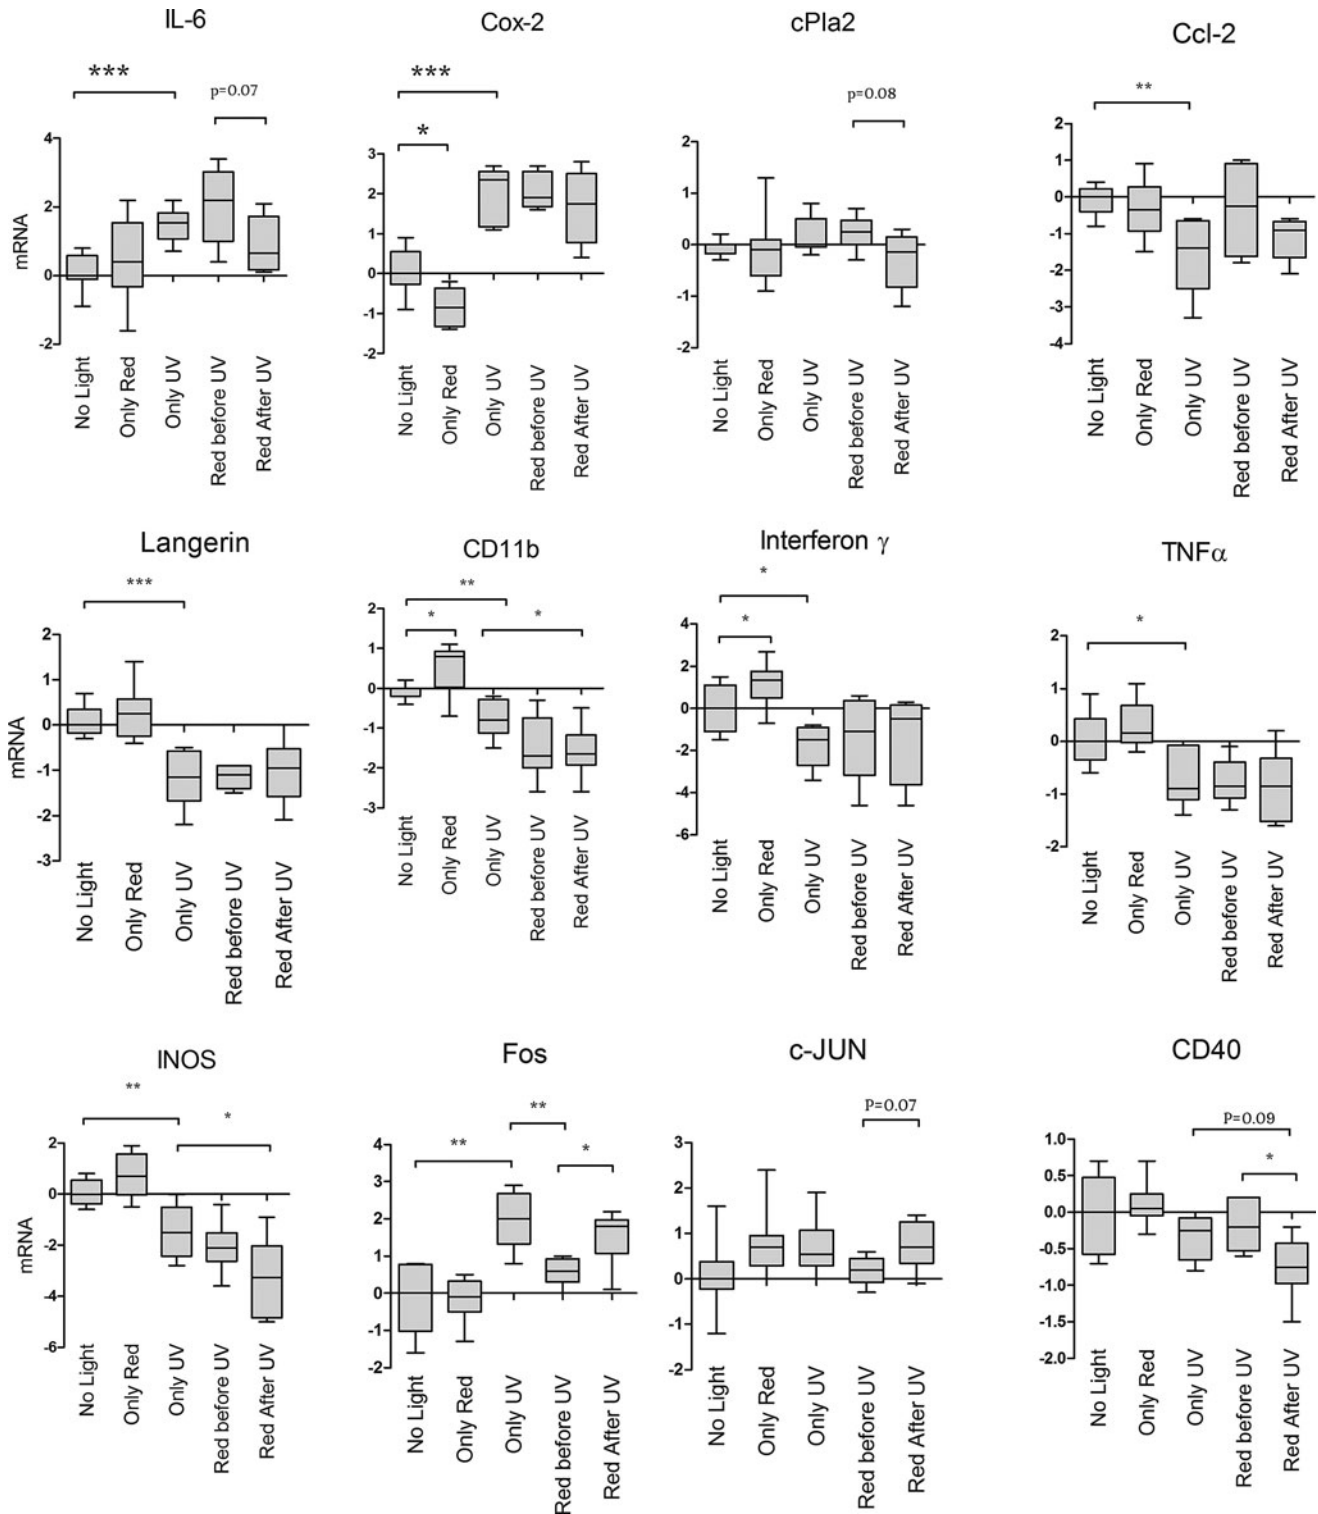

**FIG. S1.** An expanded version of the graphs provided in the article. All treatments for 12 genes are shown. Epidermal transcripts were quantified by TaqMan assays. The number of mice per group (6 or 8) is shown in Fig. 1. Each transcript was normalized to an average of  $\beta$ -actin and glyceraldehyde 3-phosphate dehydrogenase (GAPDH). Cycle threshold (Ct) values of each sample were averaged per treatment group and normalized to the “no light” group, resulting in normalized log-copy number averages, which were plotted. Boxes indicate 1st and 3rd quartiles, whiskers indicate min and max values. (\* $p \leq 0.05$ , \*\* $p \leq 0.01$ , \*\*\* $p \leq 0.001$  by Mann–Whitney rank sum test.)
